# Supplementary material for: N-Doped carbon dot with surface dominant non-linear optical properties
Source: Royal Society of Chemistry journal article supplement (doi:10.1039/c6ra18837k), 2016-01-01
Supplement: c6ra18837k1.pdf [file c6ra18837k1.pdf]

## N-doped carbon dot with surface dominant non-linear optical property

### (Supporting Information)

Liang Bai,<sup>a§</sup> Shi Qiao,<sup>a§</sup> Hao Li,<sup>a</sup> Yu Fang,<sup>b</sup> Yanmei Yang,<sup>a</sup> Hui Huang,<sup>a</sup> Yang Liu,<sup>\*a</sup> Yinglin Song,<sup>\*b</sup> and Zhenhui Kang<sup>\*a</sup>

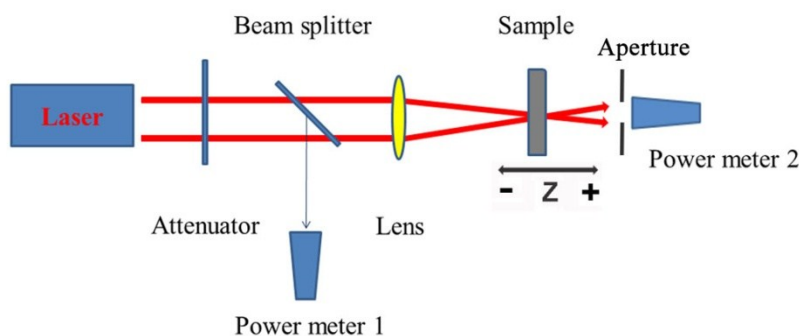

Figure S1. Experimental setup for Z-scan measurement.

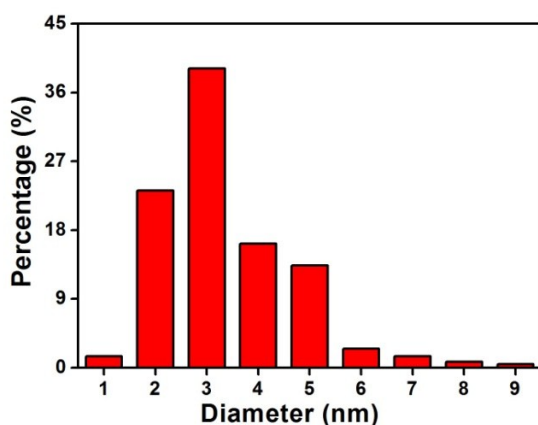

Figure S2. The particle sizes histogram of N-CDs.

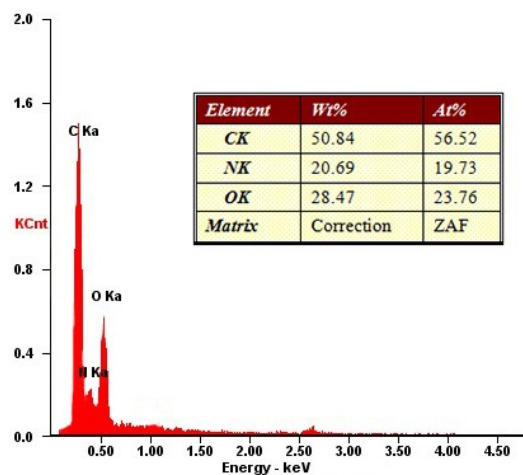

Figure S3. Energy dispersive x-ray spectroscopy analysis with element relative content of N-CDs in the inset.

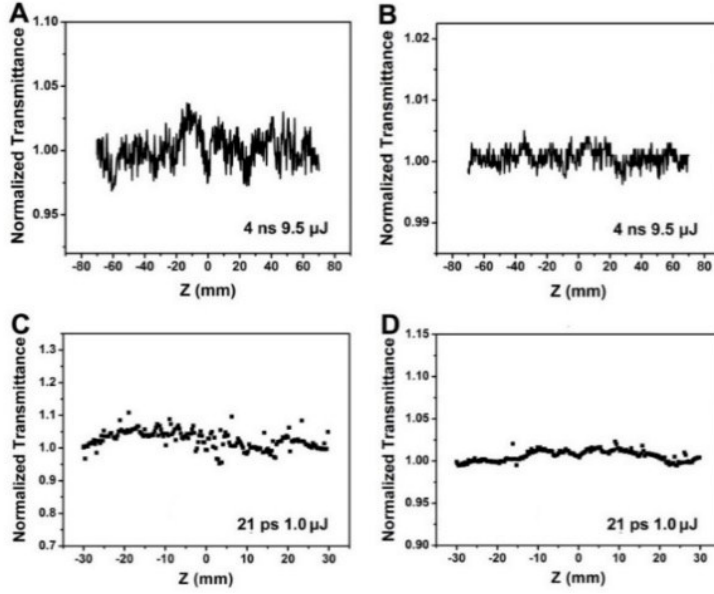

**Figure S4.** Close aperture (A and C) and open aperture (B and D) Z-scans of water measured under 532 nm, 4 ns (A and B) and 21 ps (C and D) laser excitation.

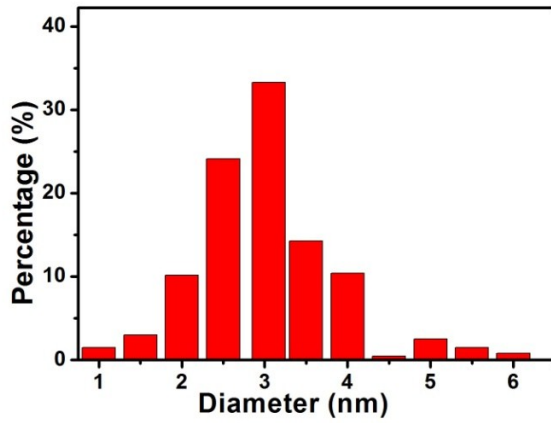

**Figure S5.** The particle sizes histogram of RN-CDs.

The Z-scan is a simple and popular experimental technique to measure the intensity dependent third-order nonlinear susceptibility of the materials. It allows the simultaneous measurement of both the nonlinear refractive index  $\gamma$  and the nonlinear absorption coefficient  $\beta$ . From these parameters, the real and the imaginary components of the third-order nonlinear susceptibility  $\chi^{(3)}$  can be calculated using the following relations <sup>26</sup>:

$$T(Z) = \frac{\alpha_0}{\sqrt{\pi}\beta I_i(Z)(1 - e^{-\alpha_0 L})} \int_{-\infty}^{\infty} \ln \left[ 1 + \beta I_i(Z) \frac{1 - e^{-\alpha_0 L}}{\alpha_0} e^{-\tau^2} \right] d\tau \quad (1)$$

$$\gamma = \frac{\Delta T_p - v\lambda}{0.812\pi I_0(1 - S)^{0.25} L_{eff}} \quad (2)$$

$$\chi_{Re}^{(3)}(esu) = \frac{cn_0^2\gamma}{120\pi^2} \quad (3)$$

$$\chi_{Im}^{(3)}(esu) = \frac{n_0^2c^2\beta}{240\pi^2\omega} \quad (4)$$

$$\chi^{(3)} = \left[ (\chi_{Im}^{(3)})^2 + (\chi_{Re}^{(3)})^2 \right]^{\frac{1}{2}} \quad (5)$$

where  $L_{\text{eff}}$  is the effective sample thickness,  $\alpha_0$  is the linear absorption coefficient at the excitation wavelength  $\lambda$ ,  $L$  is the sample length,  $I_0$  is the laser peak irradiance on the focal plane,  $z_0$  is the Rayleigh length,  $z$  is the position of the sample,  $\Delta T_{p-v}$  is the difference between the peak and the valley of the normalized transmittance, and  $S$  is the linear transmittance of the aperture, defined as  $S = 1 - \exp(-2r_a^2/w_a^2)$ , with  $r_a$  being the radius of the aperture and  $w_a$  being the beam radius at the aperture.

**Table S1.** The third-order nonlinear optical parameters of different kinds of CDs under 532 nm laser excitation.

| Sample             | Laser | $\gamma$<br>( $10^{-17} \text{ m}^2 \cdot \text{W}^{-1}$ ) | $\beta$<br>( $10^{-11} \text{ m} \cdot \text{W}^{-1}$ ) | $\chi^{(3)}$<br>( $10^{-12} \text{ esu}$ ) | $\chi^{(3)}/C^a$<br>( $10^{-12} \text{ esu} \cdot \text{L} \cdot \text{g}^{-1}$ ) | References |
|--------------------|-------|------------------------------------------------------------|---------------------------------------------------------|--------------------------------------------|-----------------------------------------------------------------------------------|------------|
| N-CDs              | 4 ns  | 2.73                                                       | 12.7                                                    | 12.5                                       | 19.8                                                                              | This work  |
| N-CDs              | 21ps  | -0.161                                                     | 0.196                                                   | 0.725                                      | 1.15                                                                              | This work  |
| B-CDs <sup>b</sup> | 4 ns  | -0.4                                                       | 5.1                                                     | 0.50                                       | 0.86                                                                              | 29         |
| B-CDs              | 35 ps | -0.0034                                                    | -                                                       | 0.0029                                     | 0.005                                                                             | 29         |
| CDs <sup>c</sup>   | 35 ps | -0.043                                                     | -                                                       | 0.048                                      | 0.026                                                                             | 30         |

<sup>a</sup>)C: sample concentration; <sup>b</sup>)B-CDs: boron doped carbon dots; <sup>c</sup>)CDs: amorphous carbon dots.
